# Supplementary material
Source: Springer Nature journal article supplement (https://www.springermedizin.de/resource/supplementary/13034_2013_256_MOESM2_ESM.pdf/9652704)
Supplement: MOESM2 [file 9652704]

## ***Enrollment***

Assessed for eligibility ( $N = 22$ )

Excluded ( $N = 7$ ):

- Did not meet inclusion criteria ( $N = 3$ )
- Declined to participate ( $N = 4$ )

## ***Allocation to pre-test***

Allocated to intervention ( $N = 15$ )

## ***Post-test***

Completed treatment ( $N = 15$ )

## ***Follow-up***

Completed treatment ( $N = 12$ )  
Did not complete treatment ( $N = 3$ )
